# Supplementary material for: HLA-DQ and HLA-DRB1 alleles associated with Henoch-Schönlein purpura nephritis in Finnish pediatric population: a genome-wide association study
Source: PubMed Central journal article supplement (PMC8260528; doi:10.1007/s00467-021-04955-7), 2021-02-16

# Figure S1

**Article title:** HLA-DQ and HLA-DRB1 alleles associated with Henoch-Schönlein purpura nephritis in Finnish pediatric population: A genome-wide association study

**Journal:** Pediatric Nephrology

**Authors:** Mikael Koskela\*, Julia Nihtilä\*, Elisa Ylinen, Kaija-Leena Kolho, Matti Nuutinen, Jarmo Ritari, Timo Jahnukainen.

\*Contributed equally to this work

**Corresponding author:** Mikael Koskela; Children's Hospital, Pediatric Research Center, University of Helsinki, Helsinki University Hospital, Helsinki, Finland. e-mail address: mikael.koskela@helsinki.fi

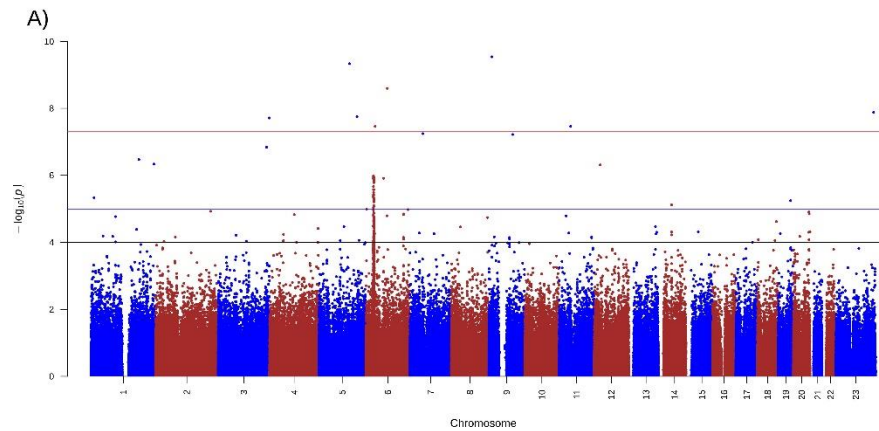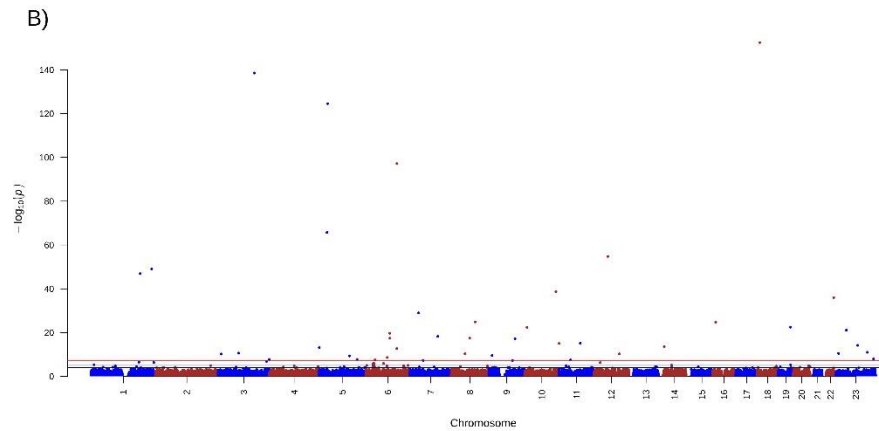

# Figure S2

**Article title:** HLA-DQ and HLA-DRB1 alleles associated with Henoch-Schönlein purpura nephritis in Finnish pediatric population: A genome-wide association study

**Journal:** Pediatric Nephrology

**Authors:** Mikael Koskela\*, Julia Nihtilä\*, Elisa Ylinen, Kaija-Leena Kolho, Matti Nuutinen, Jarmo Ritari, Timo Jahnukainen.

\*Contributed equally to this work

**Corresponding author:** Mikael Koskela; Children's Hospital, Pediatric Research Center, University of Helsinki, Helsinki University Hospital, Helsinki, Finland. e-mail address: mikael.koskela@helsinki.fi

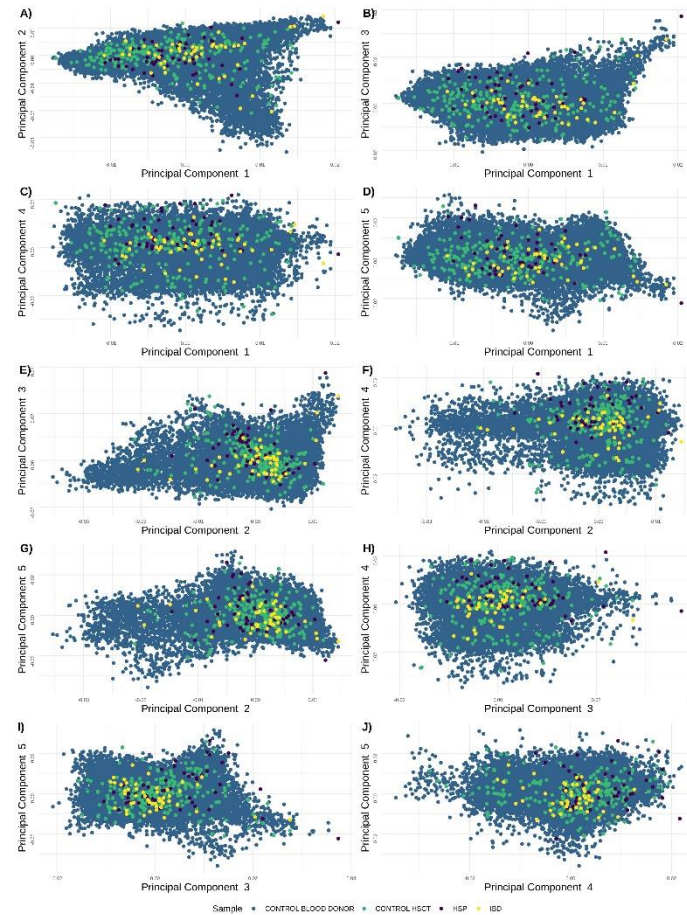

Supplement: 467_2021_4955_MOESM2_ESM.pdf [file 467_2021_4955_MOESM2_ESM.pdf]
