# Supplementary material for: HLA-DQ and HLA-DRB1 alleles associated with Henoch-Schönlein purpura nephritis in Finnish pediatric population: a genome-wide association study
Source: PubMed Central journal article supplement (PMC8260528; doi:10.1007/s00467-021-04955-7), 2021-02-16
Supplement: 467_2021_4955_MOESM3_ESM.pdf [file 467_2021_4955_MOESM3_ESM.pdf]

**Article title:** HLA-DQ and HLA-DRB1 alleles associated with Henoch-Schönlein purpura nephritis in Finnish pediatric population: A genome-wide association study

**Journal:** Pediatric Nephrology

**Authors:** Mikael Koskela\*, Julia Nihtilä\*, Elisa Ylinen, Kaija-Leena Kolho, Matti Nuutinen, Jarmo Ritari, Timo Jahnukainen. \*Contributed equally to this work

**Corresponding author:** Mikael Koskela; Children's Hospital, Pediatric Research Center, University of Helsinki, Helsinki University Hospital, Helsinki, Finland. e-mail address: mikael.koskela@helsinki.fi

**Table S1.** Polymorphisms associated to HSP susceptibility in GWAS at the genome-wide significance level  $p < 5 \times 10^{-08}$

| SNP         | Position   | Minor allele | p-value  | OR [95% CI]      | Frequency HSP | Frequency reference population |
|-------------|------------|--------------|----------|------------------|---------------|--------------------------------|
| rs7754768   | 32.452.402 | C            | 6.57e-10 | 0.14 [0.10-0.20] | 0.14          | 0.49                           |
| rs9268832   | 32.460.012 | T            | 6.57e-10 | 0.14 [0.10-0.20] | 0.14          | 0.49                           |
| rs9275578   | 32.711.607 | T            | 1.06e-09 | 4.62 [3.51-6.10] | 0.71          | 0.31                           |
| rs9275582   | 32.712.293 | T            | 1.46e-09 | 4.54 [3.45-5.98] | 0.71          | 0.31                           |
| rs2213585   | 32.445.373 | G            | 2.71e-09 | 0.15 [0.11-0.22] | 0.14          | 0.48                           |
| rs2213586   | 32.445.317 | A            | 2.71e-09 | 0.15 [0.11-0.22] | 0.14          | 0.49                           |
| rs2227139   | 32.445.682 | G            | 2.71e-09 | 0.15 [0.11-0.22] | 0.14          | 0.49                           |
| rs3763327   | 32.446.053 | G            | 2.71e-09 | 0.15 [0.11-0.22] | 0.14          | 0.49                           |
| rs7192      | 32.443.869 | T            | 2.71e-09 | 0.15 [0.11-0.22] | 0.14          | 0.49                           |
| rs7195      | 32.444.762 | A            | 2.71e-09 | 0.15 [0.11-0.22] | 0.14          | 0.49                           |
| rs3998158   | 32.714.215 | C            | 3.97e-09 | 4.39 [3.33-5.79] | 0.70          | 0.30                           |
| rs112396255 | 32.623.692 | G            | 5.35e-09 | 4.50 [3.42-5.91] | 0.58          | 0.22                           |
| rs17533090  | 32.622.945 | T            | 5.35e-09 | 4.50 [3.42-5.91] | 0.58          | 0.22                           |
| rs13194877  | 32.687.771 | A            | 6.06e-09 | 4.48 [3.41-5.89] | 0.57          | 0.20                           |
| rs9275572   | 32.711.222 | A            | 7.58e-09 | 0.17 [0.12-0.24] | 0.13          | 0.48                           |
| rs17202717  | 32.430.086 | T            | 8.59e-09 | 4.33 [3.31-5.67] | 0.57          | 0.20                           |
| rs17496307  | 32.433.259 | T            | 8.59e-09 | 4.33 [3.31-5.67] | 0.57          | 0.20                           |
| rs17496549  | 32.441.931 | T            | 8.59e-09 | 4.33 [3.31-5.67] | 0.57          | 0.20                           |
| rs17212483  | 32.697.473 | T            | 8.78e-09 | 4.27 [3.27-5.58] | 0.57          | 0.20                           |
| rs115255544 | 32.696.851 | G            | 1.14e-08 | 4.23 [3.24-5.52] | 0.57          | 0.20                           |
| rs17212462  | 32.697.348 | T            | 1.14e-08 | 4.23 [3.24-5.52] | 0.57          | 0.20                           |
| rs17212553  | 32.697.910 | T            | 1.14e-08 | 4.23 [3.24-5.52] | 0.57          | 0.20                           |
| rs17427445  | 32.695.987 | A            | 1.14e-08 | 4.23 [3.24-5.52] | 0.57          | 0.20                           |
| rs17427564  | 32.699.290 | C            | 1.14e-08 | 4.23 [3.24-5.52] | 0.57          | 0.20                           |
| rs34492195  | 32.703.056 | A            | 1.14e-08 | 4.23 [3.24-5.52] | 0.57          | 0.20                           |
| rs34677551  | 32.696.159 | C            | 1.14e-08 | 4.23 [3.24-5.52] | 0.57          | 0.20                           |
| rs35472814  | 32.692.120 | C            | 1.14e-08 | 4.23 [3.24-5.52] | 0.57          | 0.20                           |
| rs35900855  | 32.696.261 | G            | 1.14e-08 | 4.23 [3.24-5.52] | 0.57          | 0.20                           |
| rs9275516   | 32.706.866 | A            | 1.14e-08 | 0.18 [0.13-0.25] | 0.13          | 0.48                           |

|             |            |   |          |                  |      |      |
|-------------|------------|---|----------|------------------|------|------|
| rs10484561  | 32.697.643 | G | 1.67e-08 | 4.22 [3.22-5.52] | 0.57 | 0.20 |
| rs35332745  | 32.706.448 | C | 1.67e-08 | 4.11 [3.16-5.35] | 0.57 | 0.20 |
| rs12529093  | 32.448.081 | G | 1.91e-08 | 4.13 [3.16-5.38] | 0.58 | 0.21 |
| rs13209059  | 32.448.301 | G | 1.91e-08 | 4.13 [3.16-5.38] | 0.58 | 0.21 |
| rs13209234  | 32.448.198 | A | 1.91e-08 | 4.13 [3.16-5.38] | 0.58 | 0.21 |
| rs13220657  | 32.456.254 | T | 1.91e-08 | 4.13 [3.16-5.38] | 0.58 | 0.21 |
| rs28895028  | 32.447.434 | A | 1.91e-08 | 4.13 [3.16-5.38] | 0.58 | 0.21 |
| rs28895205  | 32.457.527 | G | 1.91e-08 | 4.13 [3.16-5.38] | 0.58 | 0.21 |
| rs28732229  | 32.459.604 | T | 1.91e-08 | 4.13 [3.16-5.38] | 0.58 | 0.21 |
| rs28895136  | 32.453.727 | C | 1.91e-08 | 4.13 [3.16-5.38] | 0.58 | 0.21 |
| rs3177928   | 32.444.658 | A | 1.91e-08 | 4.13 [3.16-5.38] | 0.58 | 0.21 |
| rs114169440 | 32.695.144 | A | 1.99e-08 | 4.08 [3.13-5.31] | 0.57 | 0.20 |
| rs17599077  | 32.623.281 | C | 2.25e-08 | 4.08 [3.13-5.32] | 0.54 | 0.19 |
| rs4530903   | 32.614.112 | T | 2.25e-08 | 4.08 [3.13-5.32] | 0.54 | 0.19 |
| rs6932517   | 32.710.405 | C | 2.41e-08 | 0.19 [0.14-0.27] | 0.13 | 0.48 |
| rs9275580   | 32.711.685 | G | 2.73e-08 | 3.96 [3.03-5.19] | 0.72 | 0.33 |
| rs2858331   | 32.713.500 | G | 3.74e-08 | 3.82 [2.93-4.97] | 0.65 | 0.33 |
| rs113585425 | 32.465.348 | C | 3.83e-08 | 4.04 [3.10-5.28] | 0.53 | 0.19 |
| rs72847996  | 32.417.115 | A | 3.83e-08 | 4.04 [3.10-5.28] | 0.53 | 0.19 |

**Table S2.** HLA alleles associated with HSP and IBD with a significance level of  $p < 0.05$ 

| HLA allele | HSP<br>(n = 46)          |                     |                     | IBD<br>(n = 49) |                      |                     | Reference<br>population<br>(n = 18 757) |
|------------|--------------------------|---------------------|---------------------|-----------------|----------------------|---------------------|-----------------------------------------|
|            | p-value                  | OR [95% CI]         | Allele<br>frequency | p-value         | OR [95% CI]          | Allele<br>frequency | Allele<br>frequency                     |
| DQB1*05:01 | 4.99 x 10 <sup>-09</sup> | 4.37 [3.35 – 5.71]  | 0.58                | 0.0016          | 0.36 [0.26 – 0.51]   | 0.11                | 0.2                                     |
| DQA1*0101  | 1.04 x 10 <sup>-08</sup> | 4.18 [3.21 – 5.45]  | 0.55                | 0.0014          | 0.35 [0.24 – 0.49]   | 0.10                | 0.19                                    |
| DRB1*01:01 | 2.37 x 10 <sup>-08</sup> | 4.10 [3.14 – 5.35]  | 0.54                | 0.0013          | 0.34 [0.24 – 0.49]   | 0.10                | 0.19                                    |
| DQA1*05:01 | 0.0013                   | 0.04 [0.01 – 0.18]  | 0                   | -               | -                    | -                   | 0.10                                    |
| C*04:01    | 0.0018                   | 2.21 [1.70 – 2.87]  | 0.35                | -               | -                    | -                   | 0.16                                    |
| DQB1*02:01 | 0.0020                   | 0.05 [0.01 – 0.20]  | 0                   | -               | -                    | -                   | 0.10                                    |
| DRB1*03:01 | 0.0020                   | 0.05 [0.01 – 0.20]  | 0                   | -               | -                    | -                   | 0.10                                    |
| B*35:01    | 0.0032                   | 2.15 [1.64 – 2.81]  | 0.30                | 0.039           | 0.50 [0.36 – 0.72]   | 0.10                | 0.13                                    |
| DPB1*04:02 | 0.0053                   | 2.13 [1.61 – 2.81]  | 0.37                | -               | -                    | -                   | 0.20                                    |
| DQA1*04:01 | 0.0056                   | 0.21 [0.11 – 0.40]  | 0.02                | -               | -                    | -                   | 0.09                                    |
| DQB1*04:02 | 0.0073                   | 0.22 [0.12 – 0.43]  | 0.02                | -               | -                    | -                   | 0.09                                    |
| DQA1*01:02 | 0.0080                   | 0.33 [0.21 – 0.52]  | 0.07                | -               | -                    | -                   | 0.19                                    |
| DRB1*08:01 | 0.0093                   | 0.27 [0.15 – 0.48]  | 0.03                | -               | -                    | -                   | 0.09                                    |
| C*12:03    | 0.015                    | 6.73 [2.85 – 15.88] | 0.04                | 0.00036         | 12.27 [5.75 – 26.21] | 0.06                | 0.04                                    |
| DPB1*01:01 | 0.018                    | 0.09 [0.02 – 0.36]  | 0                   | -               | -                    | -                   | 0.06                                    |
| DRB1*13:01 | 0.019                    | 0.29 [0.16 – 0.53]  | 0.03                | -               | -                    | -                   | 0.10                                    |
| A*25:01    | 0.022                    | 7.84 [2.66 – 23.1]  | 0.03                | 0.017           | 12.67 [4.15 – 38.73] | 0.02                | 0.01                                    |
| B*08:01    | 0.024                    | 0.27 [0.14 – 0.52]  | 0.02                | -               | -                    | -                   | 0.09                                    |
| DRB1*04:04 | 0.025                    | 3.12 [1.84 – 5.27]  | 0.09                | -               | -                    | -                   | 0.04                                    |
| A*02:01    | 0.033                    | 0.56 [0.43 – 0.74]  | 0.25                | -               | -                    | -                   | 0.33                                    |
| C*07:02    | 0.034                    | 0.44 [0.29 – 0.67]  | 0.08                | -               | -                    | -                   | 0.15                                    |
| B*44:02    | 0.038                    | 2.51 [1.57 – 4.00]  | 0.10                | -               | -                    | -                   | 0.06                                    |
| DQB1*06:02 | 0.042                    | 0.42 [0.27 – 0.66]  | 0.07                | -               | -                    | -                   | 0.15                                    |

|            |       |                   |      |         |                       |      |      |
|------------|-------|-------------------|------|---------|-----------------------|------|------|
| DQA1*01:03 | 0.044 | 0.36 [0.2 – 0.63] | 0.03 | -       | -                     | -    | 0.09 |
| DQB1*06:03 | 0.044 | 0.36 [0.2 – 0.63] | 0.03 | -       | -                     | -    | 0.09 |
| A*32:01    | -     | -                 | -    | 0.00089 | 5.5 [3.18 – 9.50]     | 0.08 | 0.03 |
| B*39:01    | -     | -                 | -    | 0.0081  | 3.92 [2.27 – 6.76]    | 0.07 | 0.04 |
| C*02:02    | -     | -                 | -    | 0.0098  | 3.06 [1.95 – 4.78]    | 0.10 | 0.06 |
| DPB1*17:01 | -     | -                 | -    | 0.020   | 94.59 [23.61 – 378.9] | 0.02 | 0    |

**Table S3.** Power analysis results for top genome-wide significant SNPs and HLA alleles in HSP

| <b>SNP or HLA allele</b> | <b>Power</b> |
|--------------------------|--------------|
| rs7754768                | 0.92         |
| rs9275578                | 0.99         |
| DQA1*01:01               | 0.97         |
| DQB1*05:01               | 0.98         |
| DRB1*01:01               | 0.96         |

**Table S4.** HSP data according to DQB105:01/DQA101:01/DRB1\*01:01 haplotype

|                                    | Other haplotypes | DQB1*05:01/DQA1*01:01<br>/DRB1*01:01 | p-value |
|------------------------------------|------------------|--------------------------------------|---------|
| Number of patients                 | 26               | 20                                   |         |
| Gender (male:female)               | 10:16            | 9:11                                 | 0.77    |
| Renal involvement, n (%)           | 25 (96)          | 19 (95)                              |         |
| At the renal biopsy <sup>a</sup>   |                  |                                      |         |
| Age (years)                        | 9.8 ± 3.6        | 9.8 ± 2.7                            | 0.98    |
| Plasma creatinine (µmol/L)         | 51 ± 21          | 51 ± 15                              | 0.81    |
| eGFR (mL/min/1.73m <sup>2</sup> )  | 110 ± 28         | 107 ± 27                             | 0.48    |
| dU-Prot (g/day)                    | 3.2 (1.6 – 6.3)  | 1.9 (0.9 – 4.9)                      | 0.36    |
| dU-Prot (mg/h/m <sup>2</sup> )     | 105 (66 – 242)   | 83 (31 – 176)                        | 0.38    |
| Nephrotic-range proteinuria, n (%) | 18 (78)          | 12 (63)                              | 0.32    |
| Plasma albumin (g/L)               | 30.4 ± 8.9       | 29.2 ± 6.2                           | 0.39    |
| ISKDC ≥ III, n (%)                 | 17 (74)          | 17 (89)                              | 0.26    |
| At last assessment <sup>b</sup>    |                  |                                      |         |
| Proteinuria <sup>c</sup> , n (%)   | 5 (20)           | 7 (37)                               | 0.31    |
| Follow-up (years)                  | 8.3 (5.4 – 13.6) | 9.9 (6.9 – 15.6)                     | 0.36    |

<sup>a</sup>n=42<sup>b</sup>n=44 (includes patients with HSN; two patients without renal involvement were excluded)<sup>c</sup>Defined as urine protein to creatinine ratio > 20 mg/mmol or positive dipstick test (1+ to 3+)

**Table S5.** HSP data according to B35:01/DQB105:01/DQA101:01/DRB1\*01:01 haplotype

|                                    | Other haplotypes | B*35:01/DQB1*05:01/<br>DQA1*01:01/DRB1*01:01 | p-value |
|------------------------------------|------------------|----------------------------------------------|---------|
| Number of patients                 | 32               | 14                                           |         |
| Gender (male:female)               | 14:18            | 5:9                                          | 0.75    |
| Renal involvement, n (%)           | 31 (97)          | 13 (93)                                      |         |
| At the renal biopsy <sup>a</sup>   |                  |                                              |         |
| Age (years)                        | 9.8 ± 3.4        | 9.9 ± 2.8                                    | 0.91    |
| Plasma creatinine (µmol/L)         | 50 (40 – 54)     | 44 (40 – 65)                                 | 0.91    |
| eGFR (mL/min/1.73m <sup>2</sup> )  | 109 ± 26         | 107 ± 31                                     | 0.81    |
| dU-Prot (g/day)                    | 3.2 (1.0 – 6.6)  | 1.9 (1.3 – 4.8)                              | 0.60    |
| dU-Prot (mg/h/m <sup>2</sup> )     | 104 (40 – 250)   | 83 (37 – 162)                                | 0.54    |
| Nephrotic-range proteinuria, n (%) | 21 (72)          | 9 (69)                                       | >0.99   |
| Plasma albumin (g/L)               | 30.2 ± 9.0       | 29.2 ± 4.4                                   | 0.43    |
| ISKDC ≥ III, n (%)                 | 22 (76)          | 12 (92)                                      | 0.40    |
| At last assessment <sup>b</sup>    |                  |                                              |         |
| Proteinuria <sup>c</sup> , n (%)   | 6 (19)           | 6 (46)                                       | 0.14    |
| Follow-up (years)                  | 7.7 (4.5 – 13.6) | 12.0 (8.0 – 16.1)                            | 0.11    |

<sup>a</sup>n=42<sup>b</sup>n=44 (includes patients with HSN; two patients without renal involvement were excluded)<sup>c</sup>Defined as urine protein to creatinine ratio > 20 mg/mmol or positive dipstick test (1+ to 3+)

**Table S6.** Common SNPs within the HLA region in genetic correlation analysis between HSP and IBD

| <b>SNP</b>  | <b>Gene</b> | <b>Gene description</b>                               | <b>Ensembl gene id</b> | <b>Chromosome</b> | <b>Start position</b> | <b>End position</b> |
|-------------|-------------|-------------------------------------------------------|------------------------|-------------------|-----------------------|---------------------|
| rs115628514 | HLA-B       | major histocompatibility complex, class I, B          | ENSG00000234745        | 6                 | 31269491              | 31357188            |
| rs4530903   | HLA-DRB1    | major histocompatibility complex, class II, DR beta 1 | ENSG00000196126        | 6                 | 32578769              | 32589848            |
| rs9271344   | HLA-DRB1    | major histocompatibility complex, class II, DR beta 1 | ENSG00000196126        | 6                 | 32578769              | 32589848            |
| rs35472814  | HLA-DQB1    | major histocompatibility complex, class II, DQ beta 1 | ENSG00000179344        | 6                 | 32659467              | 32668383            |
| rs114169440 | HLA-DQB1    | major histocompatibility complex, class II, DQ beta 1 | ENSG00000179344        | 6                 | 32659467              | 32668383            |
| rs35122881  | HLA-DQB1    | major histocompatibility complex, class II, DQ beta 1 | ENSG00000179344        | 6                 | 32659467              | 32668383            |
| rs17427445  | HLA-DQB1    | major histocompatibility complex, class II, DQ beta 1 | ENSG00000179344        | 6                 | 32659467              | 32668383            |
| rs34677551  | HLA-DQB1    | major histocompatibility complex, class II, DQ beta 1 | ENSG00000179344        | 6                 | 32659467              | 32668383            |
| rs35900855  | HLA-DQB1    | major histocompatibility complex, class II, DQ beta 1 | ENSG00000179344        | 6                 | 32659467              | 32668383            |
| rs115255544 | HLA-DQB1    | major histocompatibility complex, class II, DQ beta 1 | ENSG00000179344        | 6                 | 32659467              | 32668383            |
| rs17212462  | HLA-DQB1    | major histocompatibility complex, class II, DQ beta 1 | ENSG00000179344        | 6                 | 32659467              | 32668383            |
| rs17212483  | HLA-DQB1    | major histocompatibility complex, class II, DQ beta 1 | ENSG00000179344        | 6                 | 32659467              | 32668383            |
| rs10484561  | HLA-DQB1    | major histocompatibility complex, class II, DQ beta 1 | ENSG00000179344        | 6                 | 32659467              | 32668383            |
| rs17212553  | HLA-DQB1    | major histocompatibility complex, class II, DQ beta 1 | ENSG00000179344        | 6                 | 32659467              | 32668383            |
| rs17427564  | HLA-DQB1    | major histocompatibility complex, class II, DQ beta 1 | ENSG00000179344        | 6                 | 32659467              | 32668383            |
